# Supplementary material for: Cyclin G and the Polycomb Repressive complexes PRC1 and PR-DUB cooperate for developmental stability
Source: PLoS Genet. 2018 Jul 11;14(7):e1007498. doi: 10.1371/journal.pgen.1007498 (PMC6065198; doi:10.1371/journal.pgen.1007498)
Supplement: S18 Table — (XLS) [file pgen.1007498.s020.xls]

## Sheet: Sheet1
S18 Table: ChIP-seq of wing imaginal discs.
Sample name	Genotype	Total reads	Discarded reads	Output reads	Unmap reads	Reads with multiple alignment	Reads with unique alignments	Reads used for analysis
Input 1	UAS-CycGΔP/+ ; +/da-Gal4	74016804	12164969	61851835	674709	18833437	42343689	42343689
Input 2	UAS-CycGΔP/+ ; +/da-Gal4	60586035	9574315	51011720	549425	15505289	34957006	34957006
ChIP 1	UAS-CycGΔP/+ ; +/da-Gal4	38850371	5533572	33316799	521632	9883983	22911184	22911184
ChIP2	UAS-CycGΔP/+ ; +/da-Gal4	48806510	7083825	41722685	549425	15505289	34957006	34957006
Input Mock	+/da-Gal4	32400000	1250000	31000000	1200000	9800000	20200000	20200000
ChIP Mock	+/da-Gal4	12500000	490000	12000000	1200000	3700000	7100000	7100000
